1 **Disparate patterns of thermal adaptation between life stages in temperate vs. tropical**  
2 **populations of *Drosophila melanogaster***

3

4

5 Brent L. Lockwood\*, Tarun Gupta, and Rosemary Scavotto

6

7

8

9 Department of Biology, The University of Vermont, Burlington, VT 05405

10

11

12

13

14

15 \*Corresponding author: Brent L. Lockwood

16 Email: Brent.Lockwood@uvm.edu

17

18

19

20

21 **Abstract**

22 Ectotherms may be threatened by increasing global temperatures, particularly if thermal  
23 adaptation is slower than climate change, as recent work has suggested. But estimates of  
24 evolutionary rates depend on the strength of natural selection, which may vary across life stages.  
25 Thus, depending on the life stage examined, comparisons of thermal tolerance among  
26 populations and species may yield inaccurate estimates of the rate at which thermal tolerance can  
27 evolve. Here we compared acute thermal tolerance in two life stages, adults and embryos, among  
28 populations of *Drosophila melanogaster* that span a broad range of thermal habitats across  
29 temperate sites in eastern North America and tropical sites around the globe. We report no  
30 variation in adult thermal tolerance among populations across this broad geographic range. In  
31 contrast, embryonic thermal tolerance was significantly higher in individuals from tropical sites  
32 compared to temperate sites. Embryonic thermal tolerance was similar among temperate  
33 populations, but among tropical populations embryonic thermal tolerance was positively  
34 correlated with maximum habitat temperature. We further report that embryos live closer to their  
35 upper thermal limits than adults—i.e., thermal safety margins are smaller for embryos than adults.  
36 F1 hybrid embryos from crosses between temperate and tropical populations had embryonic  
37 thermal tolerance that matched that of tropical embryos, suggesting phenotypic dominance of  
38 heat-tolerant alleles. Together our findings demonstrate that thermal tolerance readily evolves in  
39 the earliest and most thermally sensitive life stage and suggest that thermal selection may be  
40 more limited in the adult life stage. Disparate patterns of embryonic thermal tolerance between  
41 temperate and tropical populations may be the result of regional differences in seasonality.

42

43

## 44 **Introduction**

45 Extreme temperatures, which may be encountered at the edge of a species' geographic range  
46 (Hilbish et al., 2010) or episodically during the hottest or coldest days of the year (Hoffmann,  
47 2010; Dowd et al., 2015; Buckley and Huey, 2016), can cause populations to experience  
48 mortality (Helmuth et al., 2002; Denny et al., 2006) and ultimately lead to thermal adaptation  
49 (Lenski and Bennett, 1993; Mongold et al., 1999; Hangartner and Hoffmann, 2015). However,  
50 recent work suggests that thermal adaptation of upper thermal limits may be evolutionarily  
51 constrained (Hoffmann et al., 2013; Schou et al., 2014; Hangartner and Hoffmann, 2015;  
52 Kristensen et al., 2015; van Heerwaarden et al., 2016), such that the evolution of increased heat  
53 tolerance may be a relatively slow process that takes many millions of years to achieve  
54 (Kellermann et al., 2012). If this is the case, global climate change, which has led to rapid  
55 increases in mean temperatures and the frequency of extreme thermal events (Katz and Brown,  
56 1992; Meehl et al., 2000; Cai et al., 2014), may cause shifts in geographic distributions (Rank  
57 and Dahlhoff, 2002; Burrows et al., 2011; Thomas et al., 2012; Sunday et al., 2012) as  
58 populations may not be able to adapt fast enough to persist in hotter environments.

59 But evolutionary rates depend on several factors that may not be taken into account in  
60 estimates of thermal adaptive potential. In particular, adaptive rates depend on the strength of  
61 natural selection (Bennett et al., 1992; Rudolph et al., 2010), and studies that focus on thermal  
62 tolerance of mobile organisms or life stages may over estimate the degree to which these  
63 organisms encounter thermal selection in nature. In other words, thermal safety margins—i.e.,  
64 the difference between upper thermal limits and maximum habitat temperature—may be larger  
65 than predicted because thermal environmental heterogeneity allows mobile organisms to avoid  
66 thermal extremes via behavioral thermoregulation (Dillon et al., 2009; Gunderson and Leal,  
67 2012). To date, there have been relatively few studies that examine thermal adaptation in  
68 immobile organisms or life stages, particularly in the terrestrial realm (Angilletta et al., 2013;  
69 MacLean et al., 2016), and immobile organisms may represent ideal study systems to investigate  
70 the evolutionary potential of thermal tolerance. In support of this conjecture, broad scale patterns  
71 of thermal tolerance are more tightly correlated with habitat temperatures in marine systems than  
72 in terrestrial systems (Sunday et al., 2011), perhaps due to the more limited range of thermal  
73 microhabitats in the marine realm (Denny et al., 2011) that makes behavioral thermoregulation a  
74 less effective buffering mechanism.

75 Here we sought to compare adult and embryonic heat tolerance among populations of  
76 fruit flies, *Drosophila melanogaster*, from a broad range of thermal habitats across the world to  
77 ascertain the degree to which thermal selection has shaped the evolution of thermal tolerance  
78 across immobile vs. mobile life stages. Adult thermal tolerance has been extensively studied in  
79 natural populations of *D. melanogaster*—particularly in eastern Australia (Hoffmann et al.,  
80 2002; Sgro et al., 2010; Buckley and Huey, 2016)—but to a large extent, the thermal physiology  
81 of the early embryonic life stage of *D. melanogaster* has not been characterized in natural  
82 populations (Kristensen et al., 2015). Studies of lab-bred *D. melanogaster* have shown that early  
83 embryos (0 – 2 hours post-fertilization) are more thermally sensitive than later stages (Walter et

84 al., 1990), perhaps due to the reduced heat-shock response in early embryos (Graziosi et al.,  
85 1980; Welte et al., 1993). Thus, we compared heat tolerance of adults and early stage embryos to  
86 determine whether or not differences in thermal sensitivity, as well as mobility, lead to different  
87 patterns of thermal adaptation across life stages. The thermal environment of *D. melanogaster*  
88 can change rapidly ( $+18^{\circ}\text{C h}^{-1}$ ) and reach extreme values ( $> 40^{\circ}\text{C}$ ) (Feder et al., 1997). Therefore,  
89 we designed our thermal stress experiments to mimic sudden (acute) changes in temperature that  
90 are characteristic of the variable thermal environments that flies experience in nature (Terblanche  
91 et al., 2011). We report higher embryonic thermal tolerance in tropical (hotter) vs. temperate  
92 (cooler) populations but no difference in adult thermal tolerance, and thus we demonstrate that  
93 thermal selection likely varies across life stages. Moreover, our data suggest that there is  
94 significant adaptive potential for upper thermal limits in the earliest and most thermally sensitive  
95 life stage.

96

## 97 **Results**

### 98 **Thermal tolerance and thermal safety margins across life stages**

99 We found no difference in adult thermal tolerance among all sites (Figs. 1B and 1C), with an  
100 overall mean  $CT_{\text{max}}$  ( $\pm 95\%$  C.I.) of  $38.8 \pm 0.45^{\circ}\text{C}$ . Embryonic thermal tolerance ( $LT_{50}$ ) did not  
101 differ among the three temperate sites but was significantly higher in tropical vs. temperate  
102 embryos (Figs. 1D and 1E). Overall, tropical embryos were more heat tolerant; the average  $LT_{50}$   
103 was approximately  $1^{\circ}\text{C}$  higher in tropical embryos ( $35.8 \pm 0.45^{\circ}\text{C}$ ) than in temperate embryos  
104 ( $34.88 \pm 0.18^{\circ}\text{C}$ ). There was no significant relationship between adult  $CT_{\text{max}}$  and embryo  $LT_{50}$   
105 (Fig. S1).

106 Thermal safety margins—i.e., the difference between thermal tolerance ( $CT_{\text{max}}$  or  $LT_{50}$ )  
107 and maximum habitat temperature ( $T_{\text{max}}$ )—were consistently smaller for embryos than adults and  
108 smallest in the tropics. This pattern was consistent regardless of whether thermal safety margins  
109 were compared across latitude (Fig. 2A) or by region (temperate vs. tropical) (Fig. 2B).

110

### 111 **Climate variability and thermal tolerance**

112 While there is a consistent difference between our temperate and tropical sites in mean annual  
113 temperature, VT =  $5.4^{\circ}\text{C}$ , IN =  $10.8^{\circ}\text{C}$ , NC =  $15.4^{\circ}\text{C}$ , and all tropical =  $26.1 \pm 1.4^{\circ}\text{C}$  (mean  $\pm$   
114  $95\%$  C.I.), a principal components analysis of 19 Bioclim variables indicated that the greatest  
115 difference in climate among the collection locations was in temperature seasonality—defined as  
116 the yearly standard deviation in temperature. PC1 explained 95.6% of the variation in climate  
117 data among the collection sites, and this pattern largely characterized the differences in climate  
118 between temperate vs. tropical sites (Fig. S2). Temperature seasonality was the variable with the  
119 top component loading of PC1, explaining 98% of the variation in PC1. There was a significant  
120 negative relationship between PC1 and embryonic heat tolerance (Multiple least-squares linear  
121 regression with PC1 and PC2 as covariates,  $F_{1,4} = 8.1474$ ,  $P = 0.0462$ ), but this pattern was  
122 driven by the bimodal distribution of  $LT_{50}$ s between temperate vs. tropical sites and was not  
123 consistent with temperature seasonality within each geographic region (Fig. S3). PC2 explained

124 4% of the variation in climate data among collection sites, mostly characterizing the differences  
125 in climate among tropical sites (Fig. S2). Annual precipitation, precipitation of the wettest  
126 quarter, and precipitation of the wettest month were the top three component loadings of PC2,  
127 explaining 49%, 40%, and 8% of variation in PC2, respectively. But there was no significant  
128 relationship between PC2 and embryonic heat tolerance (Least-squares linear regression,  $F_{1,4} =$   
129  $0.367$ ,  $P = 0.577$ ).

130 Maximum temperature of the warmest month (i.e., maximum habitat temperature or  $T_{\max}$ )  
131 spanned a range of  $8.4^{\circ}\text{C}$  among all sites, from  $25.7^{\circ}\text{C}$  in Vermont, USA (VT) to  $34.1^{\circ}\text{C}$  in  
132 Chiapas, MX (CH). While this variation in  $T_{\max}$  explained only a small fraction of the variation  
133 in Bioclim variables among sites (0.0016% of the variation in PC1 and 0.00015% of the  
134 variation in PC2), previous studies have shown  $T_{\max}$  to be correlated with adult heat tolerance  
135 ( $CT_{\max}$ ) among many species of *Drosophila* (Kellermann et al., 2012). In contrast to this  
136 previous work, our populations of *D. melanogaster* showed no significant relationship between  
137 adult heat tolerance and  $T_{\max}$  (Fig. S4). However, the embryonic life stage exhibited a different  
138 pattern than the adults, and the relationship between embryonic heat tolerance and  $T_{\max}$  was  
139 distinct between temperate and tropical regions (Fig. 3; ANCOVA,  $F_{1,4} = 10.26$ ,  $P = 0.0328$ ).  
140 Among temperate populations there was a  $6^{\circ}\text{C}$  range in  $T_{\max}$ , but this produced no correlated  
141 response in the thermal tolerance of embryos (Fig. 3). But among tropical populations, the  
142 approximate  $4^{\circ}\text{C}$  range in  $T_{\max}$  corresponded to a positive relationship between embryonic  
143 thermal tolerance and  $T_{\max}$  (Fig. 3).

144

#### 145 **Embryonic thermal tolerance in F1 progeny from Chiapas x Vermont**

146 Offspring from reciprocal genetic crosses between the most heat tolerant tropical genotype (CH)  
147 and the least heat tolerant temperate genotype (VT-12) had thermal tolerances that closely  
148 resembled that of the heat tolerant CH genotype, regardless of the direction of the cross (Fig. 4).  
149 Embryonic  $LT_{50}$ s of F1 progeny of both crosses ( $\text{CH}_{\text{♀}} \times \text{VT}_{\text{♂}} = 35.83^{\circ}\text{C}$  and  $\text{VT}_{\text{♀}} \times \text{CH}_{\text{♂}} =$   
150  $35.80^{\circ}\text{C}$ ) were statistically indistinguishable from the  $LT_{50}$  of CH ( $36.24^{\circ}\text{C}$ ) but significantly  
151 higher than the  $LT_{50}$  of VT-12 ( $34.23^{\circ}\text{C}$ ; Fig. 4).

152

#### 153 **Discussion**

154 Despite the potential for thermal adaptation across the broad range of thermal habitats  
155 represented in this study, our data suggest that thermal selection does not act equally across life  
156 stages in *D. melanogaster*. Rather, we provide evidence of adaptive variation in upper thermal  
157 limits in the thermally sensitive and immobile embryonic life stage but not in the more thermally  
158 tolerant and mobile adult stage. This is perhaps not surprising, given that lower thermal tolerance  
159 in early embryos translates into smaller thermal safety margins. Thus, we predict that embryos  
160 encounter lethal temperatures more frequently than adults, particularly because embryos lack the  
161 ability to behaviorally avoid thermally stressful conditions, and this likely drives divergence in  
162 embryonic thermal tolerance between temperate and tropical populations.

163           Recent estimates of divergence in adult thermal tolerance among populations of *D.*  
164 *melanogaster* have brought into question the degree of adaptive potential in upper thermal limits  
165 in this species, as comparisons of populations across latitude have yielded mixed results  
166 depending on assay methods (Sgro et al., 2010) and the laboratory in which thermal tolerance  
167 was measured (Hoffmann et al., 2002; Hoffmann, 2010; Buckley and Huey, 2016). Our estimates  
168 of *D. melanogaster* adult male CT<sub>max</sub> are consistent with previous reports (Gilchrist et al., 1997;  
169 Chown et al., 2009; Kellermann et al., 2012), and while we report novel findings on the  
170 adaptation of embryonic thermal tolerance, our results are not unprecedented. Coyne et al.  
171 (Coyne et al., 1983) reported a similar discrepancy in thermal adaptation between mobile and  
172 immobile life stages among populations of *Drosophila pseudoobscura*—pupal thermal tolerance,  
173 but not adult thermal tolerance, was higher in populations from warmer locations. Thus,  
174 comparisons of adult (mobile stage) thermal tolerance among populations may not accurately  
175 predict the adaptive potential of upper thermal limits. Moreover, the interplay of population  
176 genetic factors in natural populations of *D. melanogaster* suggest that this species harbors a high  
177 level of genetic diversity (Karasov et al., 2010) and that natural selection has led to allelic  
178 divergence among populations across the genome (Fabian et al., 2012). In light of these trends in  
179 population genomics, and the adaptive variation in embryonic thermal tolerance presented in this  
180 study, it seems probable that there is significant natural variation of upper thermal limits in *D.*  
181 *melanogaster* but that this variation may only be revealed in the embryonic and other immobile  
182 life stages.

183           It is important to note that lab selection experiments in *D. melanogaster*, *Escherichia coli*,  
184 and marine copepods (*Tigriopus californicus*) that imposed strong selection on thermal tolerance  
185 reported significant potential for adaptation of upper thermal limits, but the response to selection  
186 eventually plateaued after many generations, presumably when standing genetic diversity had  
187 been exhausted (Huey et al., 1991; Gilchrist et al., 1997; Gilchrist and Huey, 1999; Rudolph et  
188 al., 2010; Kelly et al., 2012; Hangartner and Hoffmann, 2015). Thus, while there may likely be  
189 potential for adaptation of upper thermal limits, responses to thermal selection may not occur  
190 indefinitely in the absence of new mutational variation.

191           This study characterizes thermal tolerance among populations that span a large portion of  
192 the *D. melanogaster* biogeographic range in the northern hemisphere, and while there is clear  
193 evidence of adaptation of embryonic thermal tolerance between temperate and tropical regions,  
194 the patterns of thermal adaptation are not consistent within each region. Tropical embryos  
195 sampled from locations with higher T<sub>max</sub> showed higher thermal tolerances, yet temperate  
196 populations did not follow this trend. Why were there no observed differences in embryonic  
197 thermal tolerance among temperate populations when temperate sites spanned a broader range of  
198 thermal habitats than tropical populations? It is possible that gene flow between Vermont,  
199 Indiana, and North Carolina overwhelms local adaptation, but recent studies show evidence of  
200 adaptive divergence among *D. melanogaster* populations in eastern North America (Fabian et al.,  
201 2012; Bergland et al., 2016; Machado et al., 2016). Therefore, a more likely explanation is that  
202 seasonal fluctuations in the activity of temperate populations (Cogni et al., 2014; Bergland et al.,

203 2014), may limit the frequency at which temperate embryos encounter thermal selection. In  
204 addition, spatial and temporal microclimatic variability in temperate sites may provide more  
205 choices for females to lay their eggs at permissive temperatures (Allemand and David, 1976;  
206 Dahlggaard et al., 2001; Huey and Pascual, 2009; Dillon et al., 2009). We also note that our data  
207 constitute thermal tolerances of multiple isofemale lines from each of the three temperate sites  
208 but just one isofemale line from each of the five tropical sites. Thus, we have not captured the  
209 full range of genetic variation at each tropical site. The fact that the tropical flies originated from  
210 geographically distant locations suggests that our observed differences in embryonic thermal  
211 tolerance between temperate and tropical populations represent consistent patterns of thermal  
212 adaptation. However, our observation that embryonic thermal tolerance positively correlates with  
213 maximum temperature at tropical sites is a result that warrants further investigation. It remains to  
214 be determined whether or not this pattern will hold when a greater sample of genetic diversity is  
215 surveyed at these topical locations.

216 Investigations into the genetic basis of variation in thermal tolerance in natural  
217 populations have yielded somewhat conflicting results, depending on the species (Pereira et al.,  
218 2014; Sato et al., 2015) and the way thermal tolerance was measured (Gilchrist and Huey, 1999;  
219 Mitchell and Hoffmann, 2010; Hangartner and Hoffmann, 2015). In this study, embryonic  $LT_{50}$   
220 spanned a range of approximately 2°C among all genotypes, and crosses between genotypes at  
221 the high and low ends of this range produced F1 progeny that resembled the phenotype of the  
222 heat-tolerant parent. This result indicates phenotypic dominance of heat-tolerant alleles, at least  
223 for Chiapas vs. Vermont-12 embryos. This is a surprising result for two reasons. First, this  
224 inheritance pattern is not expected because thermal physiological traits are complex and depend  
225 on multiple interacting factors, such as lipid membrane composition (Dahlhoff and Somero,  
226 1993; Cooper et al., 2012; Cooper et al., 2014), protein stability (Lockwood and Somero, 2012;  
227 Fields et al., 2015; Leuenberger et al., 2017), and transcriptional and translational responses  
228 (Leemans et al., 2000; Lockwood et al., 2010; Tomanek and Zuzow, 2010; Chen et al., 2015;  
229 Kristensen et al., 2016). Accordingly, previous work has shown that *D. melanogaster* adult and  
230 larval thermal tolerance are quantitative traits influenced by at least 7 gene loci (Morgan and  
231 Mackay, 2006; Sambucetti et al., 2013). Similarly in species of marine invertebrates, thermal  
232 tolerance appears to have a polygenic basis, as hybrids often exhibit thermal tolerances that are  
233 intermediate between the parents (Braby and Somero, 2006). But this is not the case for *D.*  
234 *melanogaster* embryonic thermal tolerance as we have characterized it here. Second, because we  
235 examined early *D. melanogaster* embryos at 0 – 1 h post-fertilization (hpf), and zygotic genome  
236 activation has been reported to not begin until approximately 2 hpf in this species (Tadros and  
237 Lipshitz, 2009; Blythe and Wieschaus, 2015), we expected thermal tolerance to be determined by  
238 maternal effects. Instead, we found embryonic thermal tolerance to match that of the Chiapas  
239 strain regardless of maternal genotype. This suggests that either (1) the zygotic genome is being  
240 activated earlier than expected in response to heat shock (Graziosi et al., 1980), which would  
241 reveal adaptive variation in zygotic gene expression, or (2) that the effect is mediated at the level  
242 of the chromosomes, perhaps due to thermally-induced DNA damage (Yao and Somero, 2012)

243 that differentially affects different genotypes (Sveteć et al., 2016). Either way, the unknown  
244 genetic basis of embryonic thermal tolerance warrants future study.

245

## 246 **Materials and methods**

### 247 **Fly strains**

248 We obtained 19 isofemale genetic lines that were collected from temperate locations in the USA  
249 as a generous gift from B.S. Cooper and K.L. Montooth: 6 lines from Raleigh, NC (NC); 5 lines  
250 from Beasley Orchard, IN (IN); and 8 lines from East Calais, VT (VT). The creation of these  
251 lines has been previously described (Cooper et al., 2014). We obtained 5 isofemale lines from the  
252 *Drosophila* Species Stock Center at the University of California, San Diego that were collected  
253 from tropical locations around the world: 1 line each from Accra, Ghana (GH); Mumbai, India  
254 (MU); Guam, USA (GU); Chiapas, Mexico (CH); and Monkey Hill, St. Kitts (SK). Geographic  
255 coordinates of collection locations and stock numbers of isofemale lines are provided in  
256 Supplementary Table S1. We maintained flies under common-garden conditions on cornmeal-  
257 yeast-molasses medium at 25°C on a 12:12 light cycle for at least two generations prior to  
258 measuring thermal tolerance.

259

### 260 **Adult critical thermal maximum ( $CT_{max}$ )**

261 We assayed thermal tolerance of adult male flies by measuring the temperature at which flies  
262 incurred a loss of motor response along a heat ramp—i.e., the critical thermal maximum ( $CT_{max}$ ).  
263 3 to 5 day-old adult male flies were individually placed into glass vials with rubber stoppers and  
264 submerged in a water bath that was programmed to increase  $0.1^{\circ}\text{C min}^{-1}$  upwards from 25°C. We  
265 chose this rate of temperature increase based on previously published studies (Chown et al.,  
266 2009; Sgro et al., 2010; Kellermann et al., 2012) and to mimic the variable thermal environments  
267 that flies encounter in nature (Terblanche et al., 2011). Flies were regularly checked for  
268 responsiveness along the heat ramp by gently tapping the vial, and the temperature at which a fly  
269 lost the ability to move was recorded. We scored  $CT_{max}$  for each genotype via a least-squares  
270 regression model of the logistic equation among 10 flies per genotype and extrapolated  $CT_{max}$   
271 from the inflection points of the logistic curves. We conducted these curve fitting analyses in  
272 GraphPad Prism 7 for Mac OS X (GraphPad Software, La Jolla, CA).

273

### 274 **Embryonic thermal tolerance ( $LT_{50}$ )**

275 We assayed embryonic thermal tolerance by measuring survival (hatching success) of early stage  
276 embryos, 0 to 1 h post-fertilization, exposed to a 45-minute heat treatment across a range of  
277 temperatures, from 25°C to 42°C. We chose this assay method because embryos do not possess  
278 behavioral characteristics that would permit the assessment of thermal tolerance via  $CT_{max}$ , and  
279 measuring hatching success allowed us to overcome this obstacle. Previous studies conducted in  
280 a wide range of species have shown that temperature adaptive variation in survival following  
281 heat stress follows the same trends as  $CT_{max}$  (Huey et al., 1991; Gilchrist et al., 1997; Stillman  
282 and Somero, 2000; Somero, 2002; Stenseng et al., 2005; Braby and Somero, 2006; Miller and



283 Stillman, 2012; Dowd and Somero, 2013). We designed our heat treatments to mimic sudden  
284 increases in temperature that frequently occur in nature where the temperature of necrotic fruit  
285 can increase rapidly on hot days (Feder et al., 1997; Terblanche et al., 2011). 3 to 5 day-old adult  
286 flies were allowed to mate and lay eggs on grape juice agar plates for 1 h at 25°C. Egg plates  
287 were then wrapped in Parafilm, submerged in a water bath, and heat shocked for 45 minutes. The  
288 rate of temperature change averaged  $+0.4^{\circ}\text{C min}^{-1}$ . This rate of increase is within the range of  
289 measured rates of change in nature (Feder et al., 1997). Following heat shock, 20 eggs were  
290 transferred on a piece of grape juice agar to fresh food vials and placed at 25°C. Hatching  
291 success was scored as the proportion of larvae that successfully hatched by 48 h. We conducted 4  
292 to 6 replicate treatments at each of 9 temperatures (25°C, 28°C, 30°C, 32°C, 34°C, 36°C, 38°C,  
293 40°C, and 42°C) for each genotype. We used these data to calculate the lethal temperature at  
294 which 50% of the embryos failed to hatch ( $LT_{50}$ ) via a least-squares regression model of the  
295 logistic equation. In our logistic model, we allowed the y-intercept to vary between 0 and 1 and  
296 extrapolated the  $LT_{50}$  from the inflection point of the logistic curve fit. This approach allowed us  
297 to infer thermal tolerance independently from other confounding factors that may influence the  
298 measurement of hatching success, such as the presence of unfertilized eggs. We conducted these  
299 curve fitting analyses in GraphPad Prism 7.

300

### 301 **PCA of bioclimatic variables**

302 We examined the correspondence of adult and embryonic thermal tolerance to local climate  
303 conditions by examining the variation among our collection sites in 19 bioclimatic (Bioclim)  
304 variables. Bioclim variables represent biologically meaningful climate predictors that are derived  
305 from monthly temperature and rainfall data from the years 1960 to 1990 (Busby, 1991). We  
306 downloaded Bioclim variables from the WorldClim database (Hijmans et al., 2005)  
307 ([www.worldclim.org](http://www.worldclim.org)) that corresponded to the GPS coordinates of the collection sites of each  
308 population (see Table S1). Because Bioclim variables tend to covary, we used a principal  
309 components analysis (PCA) to characterize the major axes of variation in climate among our  
310 sites. We then conducted a multiple least-squares regression analysis to assess the degree to  
311 which variation in thermal tolerance could be explained by the primary principal components of  
312 these climate data. We conducted these analyses in R version 3.3.2 (Team, 2016).

313

### 314 **Statistical comparisons of thermal tolerance and thermal safety margins**

315 We compared adult ( $CT_{\text{max}}$ ) and embryonic ( $LT_{50}$ ) thermal tolerances among temperate sites (VT,  
316 IN, and NC) and all tropical sites pooled together (CH, SK, GH, MU, and GU) with ANOVA.  
317 Pairwise differences were assessed with Tukey's multiple comparison post-hoc test. We report  
318 our data as mean values with 95% confidence intervals. We calculated thermal safety margins as  
319 the difference between thermal tolerance (adult  $CT_{\text{max}}$  or embryo  $LT_{50}$ ) and maximum  
320 temperature of the warmest month ( $T_{\text{max}}$ ) at each site (see above for description of Bioclim data).  
321 Fine-scale spatial temperature data are not available for these collection sites, but while  $T_{\text{max}}$  may  
322 not perfectly match the thermal environment experienced by flies, variation in  $T_{\text{max}}$  should reflect

323 relative differences in the thermal environments among locations. We compared thermal safety  
324 margins across latitude, as in Kellerman et al. (Kellermann et al., 2012), between adults and  
325 embryos using non-linear least-squares regression followed by the extra sum-of-squares F-test to  
326 compare model fits. In a separate analysis, we assessed the main effects of region (temperate vs.  
327 tropical), life stage (adult vs. embryo), and their interaction on thermal safety margins via a 2-  
328 way ANOVA. Least-squares linear regression was used to assess the relationship between  
329 embryonic thermal tolerance and significant climate variables. ANCOVA was used to assess the  
330 difference in slopes of regression lines fit to data from temperate vs. tropical sites. We assessed  
331 the genetic basis of differences in embryonic thermal tolerance by conducting reciprocal crosses  
332 between the two parental strains that had the highest and lowest  $LT_{50}$ , Chiapas, MX (CH) and  
333 Vermont, USA strain #12 (VT-12), respectively, and measured thermal tolerance of F1 progeny.  
334 We used logistic models to fit the hatching success data, as described above, and compared  
335  $LT_{50}$ s of the parental strains and their F1 progeny by an extra sum-of-squares F-test of the  
336 extrapolated  $LT_{50}$ s. We conducted these analyses in GraphPad Prism 7.

337

### 338 **Acknowledgements**

339 We thank Kristi Montooth and Cole Julick for generously providing fly stocks. We also thank  
340 Andrew Nguyen for R code that was helpful in generating the map shown in Figure 1. This work  
341 was funded by the University of Vermont.

342 **References**

- 343 **Allemand, R. and David, J. R.** (1976). The circadian rhythm of oviposition in *Drosophila*  
344 *melanogaster*: a genetic latitudinal cline in wild populations. *Experientia* **32**, 1403–1404.
- 345 **Angilletta, M. J., Zelic, M. H., Adrian, G. J., Hurliman, a. M. and Smith, C. D.** (2013). Heat  
346 tolerance during embryonic development has not diverged among populations of a  
347 widespread species (*Sceloporus undulatus*). *Conserv. Physiol.* **1**, cot018-cot018.
- 348 **Bennett, A. F., Lenski, R. E. and Mittler, J. E.** (1992). Evolutionary Adaptation to  
349 Temperature . I . Fitness Responses of *Escherichia coli* to Changes in its Thermal  
350 Environment. *Evolution (N. Y.)*. **46**, 16–30.
- 351 **Bergland, A. O., Behrman, E. L., O'Brien, K. R., Schmidt, P. S. and Petrov, D. a.** (2014).  
352 Genomic Evidence of Rapid and Stable Adaptive Oscillations over Seasonal Time Scales in  
353 *Drosophila*. *PLoS Genet.* **10**, e1004775.
- 354 **Bergland, A. O., Tobler, R., Gonzalez, J., Schmidt, P. and Petrov, D.** (2016). Secondary  
355 contact and local adaptation contribute to genome-wide patterns of clinal variation in  
356 *Drosophila melanogaster*. *Mol. Ecol.* **25**, 1157–1174.
- 357 **Blythe, S. A. and Wieschaus, E. F.** (2015). Coordinating Cell Cycle Remodeling with  
358 Transcriptional Activation at the *Drosophila* MBT. *Curr. Top. Dev. Biol.* **113**, 113–148.
- 359 **Braby, C. E. and Somero, G. N.** (2006). Following the heart: temperature and salinity effects  
360 on heart rate in native and invasive species of blue mussels (genus *Mytilus*). *J. Exp. Biol.*  
361 **209**, 2554–2566.
- 362 **Buckley, L. B. and Huey, R. B.** (2016). How Extreme Temperatures Impact Organisms and the  
363 Evolution of their Thermal Tolerance. *Integr. Comp. Biol.* 1–12.
- 364 **Burrows, M. T., Schoeman, D. S., Buckley, L. B., Moore, P., Poloczanska, E. S., Brander, K.**  
365 **M., Brown, C., Bruno, J. F., Duarte, C. M., Halpern, B. S., et al.** (2011). The pace of  
366 shifting climate in marine and terrestrial ecosystems. *Science (80- )*. **334**, 652–655.
- 367 **Busby, J. R.** (1991). BIOCLIM-a bioclimate analysis and prediction system. *Plant Prot. Q.*
- 368 **Cai, W., Borlace, S., Lengaigne, M., van Rensch, P., Collins, M., Vecchi, G., Timmermann,**  
369 **A., Santoso, A., McPhaden, M. J., Wu, L., et al.** (2014). Increasing frequency of extreme  
370 El Niño events due to greenhouse warming. *Nat. Clim. Chang.* **5**, 1–6.
- 371 **Chen, J., Nolte, V. and Schlotterer, C.** (2015). Temperature-Related Reaction Norms of Gene  
372 Expression: Regulatory Architecture and Functional Implications. *Mol. Biol. Evol.*
- 373 **Chown, S. L., Jumbam, K. R., Sørensen, J. G. and Terblanche, J. S.** (2009). Phenotypic  
374 variance, plasticity and heritability estimates of critical thermal limits depend on  
375 methodological context. *Funct. Ecol.* **23**, 133–140.
- 376 **Cogni, R., Kuczynski, C., Koury, S., Lavington, E., Behrman, E. L., O'Brien, K. R.,**  
377 **Schmidt, P. S. and Eanes, W. F.** (2014). The Intensity of Selection Acting on the Couch  
378 Potato Gene - Spatial-Temporal Variation in a Diapause Cline. *Evolution (N. Y.)*. **68**, 538–  
379 548.
- 380 **Cooper, B. S., Hammad, L. a., Fisher, N. P., Karty, J. a. and Montooth, K. L.** (2012). In a  
381 variable thermal environment selection favors greater plasticity of cell membranes in  
382 *drosophila melanogaster*. *Evolution (N. Y.)*. **66**, 1976–1984.
- 383 **Cooper, B. S., Hammad, L. a. and Montooth, K. L.** (2014). Thermal adaptation of cellular  
384 membranes in natural populations of *Drosophila melanogaster*. *Funct. Ecol.* **28**, 886–894.
- 385 **Coyne, J. a., Bundgaard, J. and Prout, T.** (1983). Geographic Variation of Tolerance to  
386 Environmental Stress in *Drosophila pseudoobscura*. *Am. Nat.* **122**, 474.
- 387 **Dahlgaard, J., Hasson, E. and Loeschke, V.** (2001). Behavioral differentiation in oviposition

- 388 activity in *Drosophila buzzatii* from highland and lowland populations in Argentina:  
389 plasticity or thermal adaptation? *Evolution (N. Y.)* **55**, 738–47.
- 390 **Dahlhoff, E. and Somero, G. N.** (1993). Effects of temperature on mitochondria from Abalone  
391 (genus *Haliotis*) - adaptive plasticity and its limits. *J. Exp. Biol.* **185**, 151–168.
- 392 **Denny, M. W., Miller, L. P. and Harley, C. D. G.** (2006). Thermal stress on intertidal limpets:  
393 long-term hindcasts and lethal limits. *J. Exp. Biol.* **209**, 2420–2431.
- 394 **Denny, M. W., Dowd, W. W., Bilir, L. and Mach, K. J.** (2011). Spreading the risk: Small-  
395 scale body temperature variation among intertidal organisms and its implications for species  
396 persistence. *J. Exp. Mar. Bio. Ecol.* **400**, 175–190.
- 397 **Dillon, M. E., Wang, G., Garrity, P. a and Huey, R. B.** (2009). Review: Thermal preference in  
398 *Drosophila*. *J. Therm. Biol.* **34**, 109–119.
- 399 **Dowd, W. W. and Somero, G. N.** (2013). Behavior and survival of *Mytilus* congeners following  
400 episodes of elevated body temperature in air and seawater. *J. Exp. Biol.* **216**, 502–14.
- 401 **Dowd, W. W., King, F. A. and Denny, M. W.** (2015). Thermal variation, thermal extremes and  
402 the physiological performance of individuals. *J. Exp. Biol.* **218**, 1956–1967.
- 403 **Fabian, D. K., Kapun, M., Nolte, V., Kofler, R., Schmidt, P. S., Schlötterer, C. and Flatt, T.**  
404 (2012). Genome-wide patterns of latitudinal differentiation among populations of  
405 *Drosophila melanogaster* from North America. *Mol. Ecol.* **21**, 4748–69.
- 406 **Feder, M. E., Blair, N. and Figueras, H.** (1997). Natural thermal stress and heat shock protein  
407 expression in *Drosophila* larvae and pupae. *Funct. Ecol.* **11**, 90–100.
- 408 **Fields, P. A., Dong, Y., Meng, X. and Somero, G. N.** (2015). Adaptations of protein structure  
409 and function to temperature: there is more than one way to “skin a cat.” *J. Exp. Biol.* **218**,  
410 1801–1811.
- 411 **Gilchrist, G. W. and Huey, R. B.** (1999). The direct response of *Drosophila melanogaster* to  
412 selection on knockdown temperature. *Heredity.* **83 ( Pt 1)**, 15–29.
- 413 **Gilchrist, G. W., Huey, R. and Partridge, L.** (1997). Thermal Sensitivity of *Drosophila*  
414 *melanogaster*: Evolutionary Responses of Adults and Eggs to Laboratory Natural Selection  
415 at Different Temperatures. *Physiol. Zool.* **70**, 403–414.
- 416 **Graziosi, G., Micali, F., Marzari, R., de Cristini, F. and Savoini, A.** (1980). Variability of  
417 response of early *Drosophila* embryos to heat shock. *J. Exp. Zool.* **214**, 141–145.
- 418 **Gunderson, A. R. and Leal, M.** (2012). Geographic variation in vulnerability to climate  
419 warming in a tropical Caribbean lizard. *Funct. Ecol.* **26**, 783–793.
- 420 **Hangartner, S. and Hoffmann, A. a.** (2015). Evolutionary potential of multiple measures of  
421 upper thermal tolerance in *Drosophila melanogaster*. *Funct. Ecol.* **30**, n/a-n/a.
- 422 **Helmuth, B., Harley, C. D. G., Halpin, P. M., O’Donnell, M., Hofmann, G. E. and**  
423 **Blanchette, C. A.** (2002). Climate change and latitudinal patterns of intertidal thermal  
424 stress. *Science (80-. )*. **298**, 1015–1017.
- 425 **Hijmans, R. J., Cameron, S. E., Parra, J. L., Jones, P. G. and Jarvis, A.** (2005). Very high  
426 resolution interpolated climate surfaces for global land areas. *Int. J. Climatol.* **25**, 1965–  
427 1978.
- 428 **Hilbish, T. J., Brannock, P. M., Jones, K. R., Smith, A. B., Bullock, B. N., Wetthey, D. S. and**  
429 **Smith, AB** (2010). Historical changes in the distributions of invasive and endemic marine  
430 invertebrates are contrary to global warming predictions: the effects of decadal climate  
431 oscillations. *J. Biogeogr.* **37**, 423–431.
- 432 **Hoffmann, A. A.** (2010). Physiological climatic limits in *Drosophila*: patterns and implications.  
433 *J. Exp. Biol.* **213**, 870–880.

- 434 **Hoffmann, A. A., Anderson, A. and Hallas, R.** (2002). Opposing clines for high and low  
435 temperature resistance in *Drosophila melanogaster*. *Ecol. Lett.* **5**, 614–618.
- 436 **Hoffmann, A. A., Chown, S. L. and Clusella-trullas, S.** (2013). Upper thermal limits in  
437 terrestrial ectotherms: how constrained are they? *Funct. Ecol.* **27**, 934–949.
- 438 **Huey, R. B. and Pascual, M.** (2009). Partial thermoregulatory compensation by a rapidly  
439 evolving invasive species along a latitudinal cline. *Ecology* **90**, 1715–1720.
- 440 **Huey, R. B., Patridge, L. and Fowler, K.** (1991). Thermal sensitivity of *Drosophila*  
441 *melanogaster* responds rapidly to laboratory natural selection. *Evolution (N. Y.)*. **45**, 751–  
442 756.
- 443 **Karasov, T., Messer, P. W. and Petrov, D. a** (2010). Evidence that adaptation in *Drosophila* is  
444 not limited by mutation at single sites. *PLoS Genet.* **6**, e1000924.
- 445 **Katz, R. W. and Brown, B. G.** (1992). Extreme events in a changing climate: Variability is  
446 more important than averages. *Clim. Change* **21**, 289–302.
- 447 **Kellermann, V., Overgaard, J., Hoffmann, A. a, Fløjgaard, C., Svenning, J.-C. and**  
448 **Loeschcke, V.** (2012). Upper thermal limits of *Drosophila* are linked to species  
449 distributions and strongly constrained phylogenetically. *Proc. Natl. Acad. Sci. U. S. A.* **109**,  
450 16228–33.
- 451 **Kelly, M. W., Sanford, E. and Grosberg, R. K.** (2012). Limited potential for adaptation to  
452 climate change in a broadly distributed marine crustacean. *Proc. R. Soc. B-Biological Sci.*  
453 **279**, 349–356.
- 454 **Kristensen, T. N., Overgaard, J., Lassen, J., Hoffmann, A. a and Sgrò, C.** (2015). Low  
455 evolutionary potential for egg-to-adult viability in *Drosophila melanogaster* at high  
456 temperatures. *Evolution (N. Y.)*. **69**, 803–814.
- 457 **Kristensen, T. N., Kjeldal, H., Schou, M. F. and Nielsen, J. L.** (2016). Proteomic data reveals  
458 a physiological basis for costs and benefits associated with thermal acclimation. *J. Exp. Biol.*  
459 in press.
- 460 **Leemans, R., Egger, B., Loop, T., Kammermeier, L., He, H., Hartmann, B., Certa, U.,**  
461 **Hirth, F. and Reichert, H.** (2000). Quantitative transcript imaging in normal and heat-  
462 shocked *Drosophila* embryos by using high-density oligonucleotide arrays. *Proc Natl Acad*  
463 *Sci U S A* **97**, 12138–12143.
- 464 **Lenski, R. E. and Bennett, A. F.** (1993). Evolutionary Response of *Escherichia coli* to Thermal  
465 Stress. *Am. Nat.* **142**, S47–S64.
- 466 **Leuenberger, P., Ganscha, S., Kahraman, A., Cappelletti, V., Boersema, P. J., von Mering,**  
467 **C., Claassen, M. and Picotti, P.** (2017). Cell-wide analysis of protein thermal unfolding  
468 reveals determinants of thermostability. *Science (80-. )*. **355**, eaai7825.
- 469 **Lockwood, B. L. and Somero, G. N.** (2012). Functional determinants of temperature adaptation  
470 in enzymes of cold- versus warm-adapted mussels (Genus *Mytilus*). *Mol. Biol. Evol.* **29**,  
471 3061–70.
- 472 **Lockwood, B. L., Sanders, J. G. and Somero, G. N.** (2010). Transcriptomic responses to heat-  
473 stress in invasive and native blue mussels (genus *Mytilus*): molecular correlates of invasive  
474 success. *J. Exp. Biol.* **213**, 3548–3558.
- 475 **Machado, H. E., Bergland, A. O., O'Brien, K. R., Behrman, E. L., Schmidt, P. S. and**  
476 **Petrov, D. A.** (2016). Comparative population genomics of latitudinal variation in *D.*  
477 *simulans* and *D. melanogaster*. *Mol. Ecol.*
- 478 **MacLean, H. J., Higgins, J. K., Buckley, L. B. and Kingsolver, J. G.** (2016). Geographic  
479 divergence in upper thermal limits across insect life stages: does behavior matter?

- 480 *Oecologia*.
- 481 **Meehl, G. a., Zwiers, F., Evans, J., Knutson, T., Mearns, L. and Whetton, P.** (2000). Trends  
482 in extreme weather and climate events: Issues related to modeling extremes in projections  
483 of future climate change. *Bull. Am. Meteorol. Soc.* **81**, 427–436.
- 484 **Miller, N. a. and Stillman, J. H.** (2012). Neural Thermal Performance in Porcelain Crabs,  
485 Genus *Petrolisthes*. *Physiol. Biochem. Zool.* **85**, 29–39.
- 486 **Mitchell, K. a. and Hoffmann, A. a.** (2010). Thermal ramping rate influences evolutionary  
487 potential and species differences for upper thermal limits in *Drosophila*. *Funct. Ecol.* **24**,  
488 694–700.
- 489 **Mongold, J. A., Bennett, A. F. and Lenski, R. E.** (1999). Evolutionary adaptation to  
490 temperature. VII. Extension of the upper thermal limit of *Escherichia coli*. *Evolution.* **53**,  
491 386–394.
- 492 **Morgan, T. and Mackay, T.** (2006). Quantitative trait loci for thermotolerance phenotypes in  
493 *Drosophila melanogaster*. *Heredity.* **96**, 232–242.
- 494 **Pereira, R. J., Barreto, F. S. and Burton, R. S.** (2014). Ecological novelty by hybridization:  
495 Experimental evidence for increased thermal tolerance by transgressive segregation in  
496 *tigriopus californicus*. *Evolution.* **68**, 204–215.
- 497 **Rank, N. E. and Dahlhoff, E. P.** (2002). Allele frequency shifts in response to climate change  
498 and physiological consequences of allozyme variation in a montane insect. *Evolution.* **56**,  
499 2278–2289.
- 500 **Rudolph, B., Gebendorfer, K. M., Buchner, J. and Winter, J.** (2010). Evolution of  
501 *Escherichia coli* for Growth at High Temperatures. *J. Biol. Chem.* **285**, 19029–19034.
- 502 **Sambucetti, P., Scannapieco, a C., Loeschcke, V. and Norry, F. M.** (2013). Heat-stress  
503 survival in the pre-adult stage of the life cycle in an intercontinental set of recombinant  
504 inbred lines of *Drosophila melanogaster*. *J. Exp. Biol.* **216**, 2953–9.
- 505 **Sato, A., Kawashima, T., Fujie, M., Hughes, S., Satoh, N. and Shimeld, S. M.** (2015).  
506 Molecular basis of canalization in an ascidian species complex adapted to different thermal  
507 conditions. *Sci. Rep.* **5**, 1–9.
- 508 **Schou, M. F., Kristensen, T. N., Kellermann, V., Schl??tterer, C. and Loeschcke, V.** (2014).  
509 A *Drosophila* laboratory evolution experiment points to low evolutionary potential under  
510 increased temperatures likely to be experienced in the future. *J. Evol. Biol.* **27**,.
- 511 **Sgro, C. M., Overgaard, J., Kristensen, T. N., Mitchell, K. A., Cockerell, F. E. and**  
512 **Hoffmann, A. A.** (2010). A comprehensive assessment of geographic variation in heat  
513 tolerance and hardening capacity in populations of *Drosophila melanogaster* from Eastern  
514 Australia. *J. Evol. Biol.* **23**, 2484–2493.
- 515 **Somero, G. N.** (2002). Thermal Physiology and Vertical Zonation of Intertidal Animals: Optima,  
516 Limits, and Costs of Living. *Integr. Comp. Biol.* **42**, 780–789.
- 517 **Stenseng, E., Braby, C. E., Somero, G. N. and Anonymous** (2005). Evolutionary and  
518 acclimation-induced variation in the thermal limits of heart function in congeneric marine  
519 snails (Genus *Tegula*): Implications for vertical zonation. *Biol. Bull. (Woods Hole)* **208**,  
520 138–144.
- 521 **Stillman, J. H. and Somero, G. N.** (2000). A comparative analysis of the upper thermal  
522 tolerance limits of eastern Pacific porcelain crabs, genus *Petrolisthes*: influences of latitude,  
523 vertical zonation, acclimation, and phylogeny. *Physiol. Biochem. Zool.* **73**, 200–208.
- 524 **Sunday, J. M., Bates, A. E. and Dulvy, N. K.** (2011). Global analysis of thermal tolerance and  
525 latitude in ectotherms. *Proc. Biol. Sci.* **278**, 1823–30.

- 526 **Sunday, J. M., Bates, A. E. and Dulvy, N. K.** (2012). Thermal tolerance and the global  
527 redistribution of animals. *Nat. Clim. Chang.* **2**, 686–690.
- 528 **Svetec, N., Cridland, J. M., Zhao, L. and Begun, D. J.** (2016). The Adaptive Significance of  
529 Natural Genetic Variation in the DNA Damage Response of *Drosophila melanogaster*.  
530 *PLOS Genet.* **12**, e1005869.
- 531 **Tadros, W. and Lipshitz, H. D.** (2009). The maternal-to-zygotic transition: a play in two acts.  
532 *Development* **136**, 3033–42.
- 533 **Team, R. C.** (2016). *R: A language and environment for statistical computing*. Vienna, Austria:  
534 R Foundation for Statistical Computing.
- 535 **Terblanche, J. S., Hoffmann, A. A., Mitchell, K. A., Rako, L., le Roux, P. C. and Chown, S.**  
536 **L.** (2011). Ecologically relevant measures of tolerance to potentially lethal temperatures. *J.*  
537 *Exp. Biol.* **214**, 3713–3725.
- 538 **Thomas, M. K., Kremer, C. T., Klausmeier, C. a and Litchman, E.** (2012). A global pattern  
539 of thermal adaptation in marine phytoplankton. *Science (80-. ).* **338**, 1085–1088.
- 540 **Tomanek, L. and Zuzow, M. J.** (2010). The proteomic response of the mussel congeners  
541 *Mytilus galloprovincialis* and *M. trossulus* to acute heat stress: implications for thermal  
542 tolerance limits and metabolic costs of thermal stress. *J. Exp. Biol.* **213**, 3559–3574.
- 543 **van Heerwaarden, B., Kellermann, V. and Sgrò, C. M.** (2016). Limited scope for plasticity to  
544 increase upper thermal limits. *Funct. Ecol.*
- 545 **Walter, M. F., Biessmann, H. and Petersen, N. S.** (1990). Heat shock causes the collapse of  
546 the intermediate filament cytoskeleton in *Drosophila* embryos. *Dev. Genet.* **11**, 270–279.
- 547 **Welte, M. A., Tetrault, J. M., Dellavalle, R. I. P. and Lindquist, S. L.** (1993). A new method  
548 for manipulating transgenes: engineering heat tolerance in a complex, multicellular  
549 organism. *Curr. Biol.* **3**, 842–853.
- 550 **Yao, C.-L. and Somero, G. N.** (2012). The impact of acute temperature stress on hemocytes of  
551 invasive and native mussels (*Mytilus galloprovincialis* and *Mytilus californianus*): DNA  
552 damage, membrane integrity, apoptosis and signaling pathways. *J. Exp. Biol.* **215**, 4267–77.  
553  
554  
555

556 **Figures and Tables**

**A**

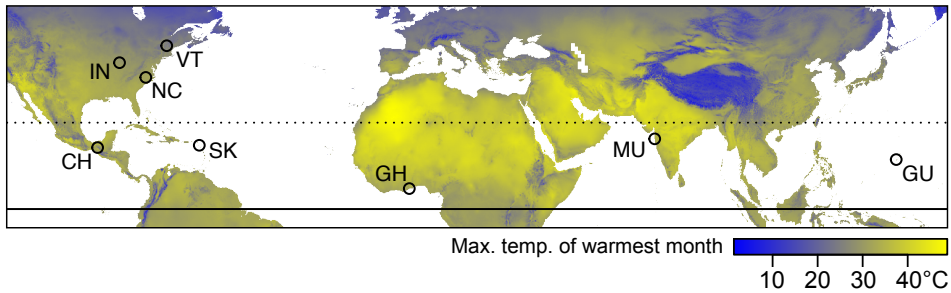

**B**

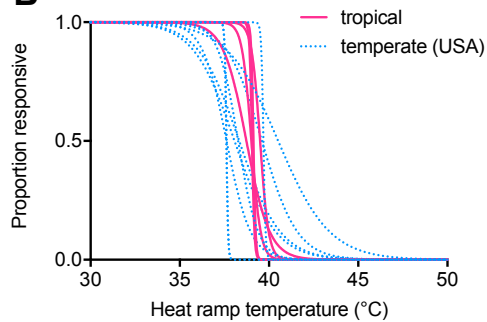

**C**

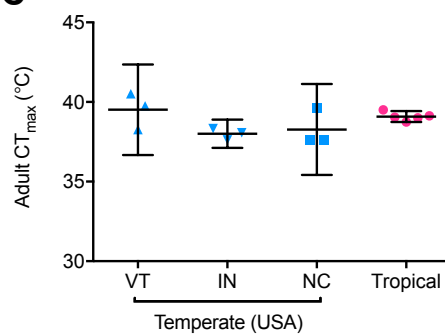

**D**

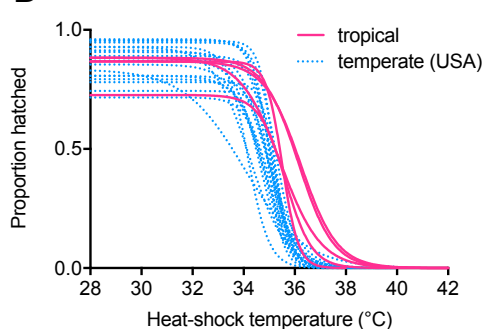

**E**

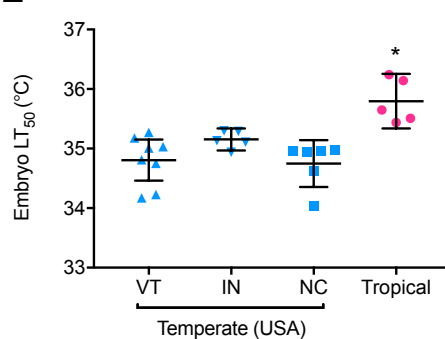

557

558 **Figure 1.**

559 **Flies from different thermal environments around the world exhibited differences in**  
560 **embryonic thermal tolerance but not adult thermal tolerance.**

561 (A) Sampling locations of isofemale lines. Color indicates maximum temperature of warmest  
562 month ( $T_{max}$ ), extrapolated from the WoldClim database. Tropical populations lie between the  
563 Equator (solid horizontal line) and the Tropic of Cancer (dotted horizontal line) and were  
564 sampled in Chiapas, Mexico (CH), Saint Kitts (SK), Accra, Ghana (GH), Mumbai, India (MU),  
565 and Guam (GU). Temperate populations lie north of the Tropic of Cancer and were sampled in  
566 Vermont (VT), Indiana (IN), and North Carolina (NC). (B) Proportion of adult male flies  
567 responsive along a heat ramp ( $+1^{\circ}\text{C min}^{-1}$  from  $25^{\circ}\text{C}$ ). Tropical lines are indicated in solid pink.



568 Temperate lines are indicated in dotted blue. (C) Adult male  $CT_{max}$  was consistent across all  
569 populations (ANOVA,  $F_{3,9} = 2.378$ ,  $P = 0.1375$ ).  $CT_{max}$  extrapolated from the survival curves in  
570 B. Solid horizontal lines show means. Error bars indicate 95% confidence intervals. (D)  
571 Proportion of eggs successfully hatched following heat shock (45 min at indicated temperature).  
572 Tropical lines are indicated in solid pink. Temperate lines are indicated in dotted blue. (E)  
573 Embryonic thermal tolerance ( $LT_{50}$ ) was higher in tropical lines than temperate lines (ANOVA,  
574  $F_{3,20} = 10.16$ ,  $P = 0.0003$ ; Tukey's test, VT vs. IN,  $q = 2.428$ ,  $P = 0.3416$ , VT vs. NC,  $q = 0.4268$ ,  
575  $P = 0.9902$ , IN vs. NC,  $q = 2.666$ ,  $P = 0.2656$ , tropical vs. VT,  $q = 6.909$ ,  $P = 0.0005$ , tropical vs.  
576 IN,  $q = 4.04$ ,  $P = 0.0444$ , tropical vs. NC,  $q = 4.04$ ,  $P = 0.0005$ ).  $LT_{50}$  extrapolated from the  
577 survival curves in D. Solid horizontal lines show means. Error bars indicate 95% confidence  
578 intervals. \* $P < 0.05$ .  
579  
580

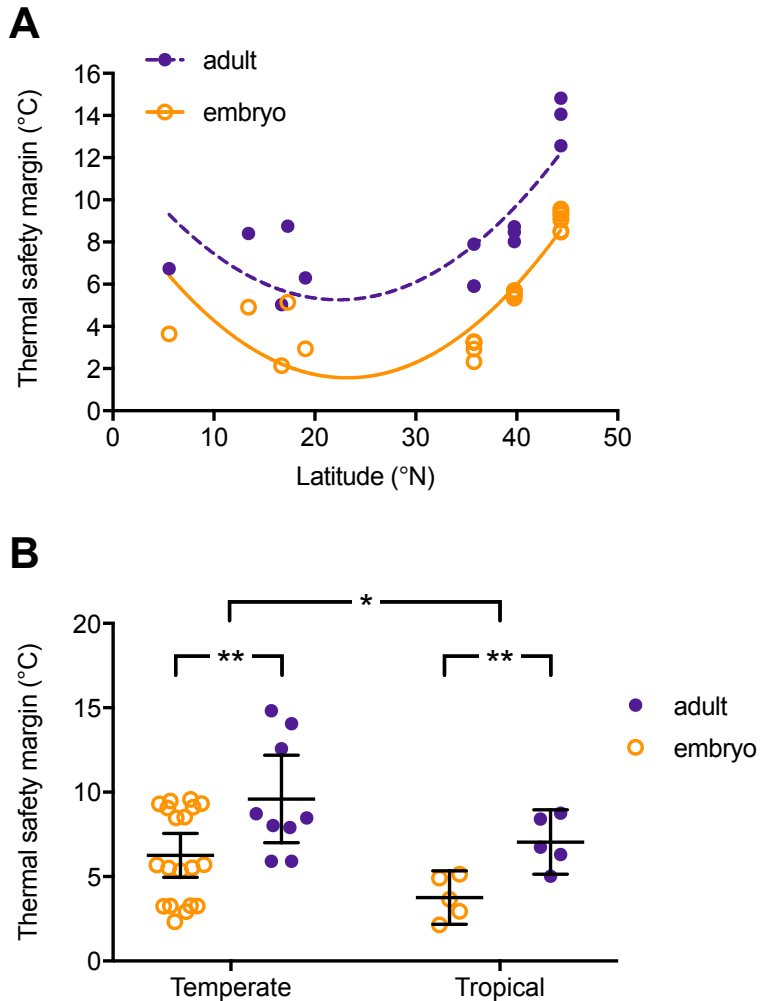

581  
582 **Figure 2.**  
583 **Thermal safety margin differs by life stage and geographic region.**  
584 (A) Thermal safety margins were smaller for embryos than adults across latitude (Extra sum-of-  
585 squares F-test on fitness of two curves,  $F_{3,32} = 15.95$ ,  $P < 0.0001$ ; Non-linear least-squares  
586 regression, embryo,  $R^2 = 0.8019$ ,  $y = 0.01563x^2 - 0.7249x + 9.97$ , adult,  $R^2 = 0.6359$ ,  $y =$   
587  $0.01437x^2 - 0.6424x + 12.44$ ). Adults are indicated in purple filled circles with dashed purple  
588 regression line. Embryos are indicated in orange open circles with solid orange regression line.  
589 (B) Thermal safety margins were smaller for embryos than adults and smaller in the tropics than  
590 temperate sites (ANOVA, main effect of region,  $F_{1,34} = 6.482$ ,  $P = 0.0156$ , main effect of life  
591 stage,  $F_{1,34} = 11.15$ ,  $P = 0.002$ , region x life stage interaction,  $F_{1,34} = 0.0006$ ,  $P = 0.98$ ). Adults  
592 are indicated in purple filled circles, and embryos are indicated in orange open circles. Solid  
593 horizontal lines show means. Error bars indicate 95% confidence intervals. \* $P < 0.05$ , \*\* $P <$   
594  $0.01$ .  
595

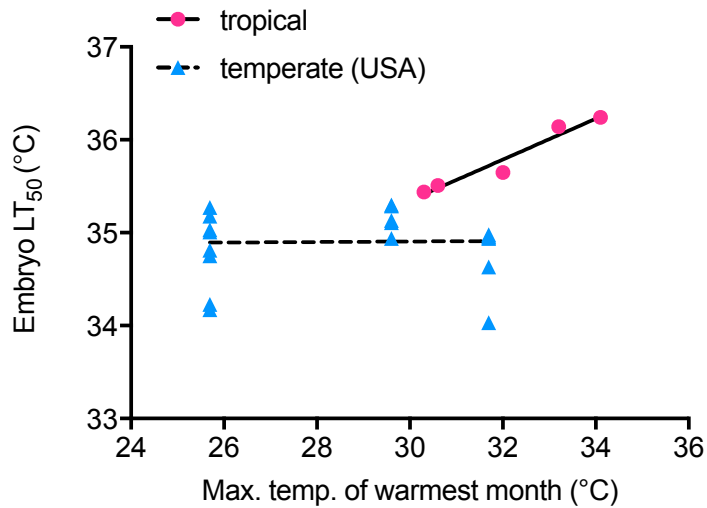

596

597 **Figure 3.**

598 **Embryonic thermal tolerance and maximum habitat temperature ( $T_{\max}$ ) by region.**

599 Embryonic thermal tolerance was positively correlated with  $T_{\max}$  among tropical populations

600 (Least-squares regression,  $R^2 = 0.9478$ ,  $P = 0.0051$ ,  $y = 0.2199x + 28.75$ ) but not temperate

601 populations (Least-squares regression,  $R^2 = 0.0015$ ,  $P = 0.9751$ ,  $y = 0.00282x + 34.82$ ). Tropical

602 genotypes are indicated in pink circles, with a solid black regression line fit. Temperate

603 genotypes are indicated in blue triangles, with a dashed black regression line fit.

604

605

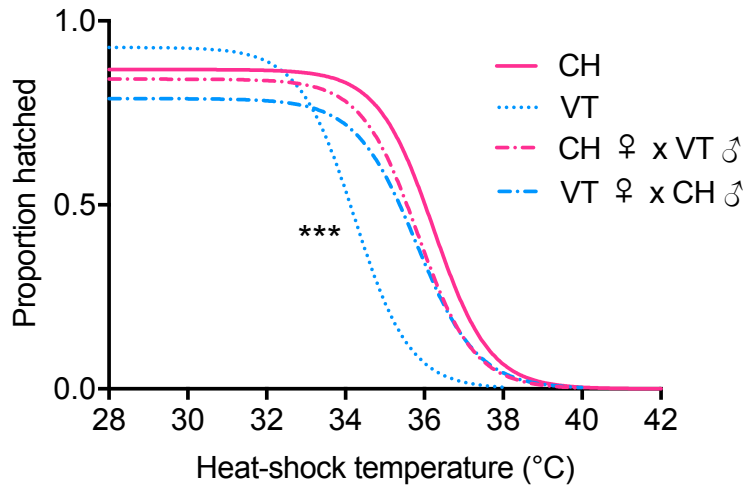

606

607 **Figure 4.**

608 **F1 progeny from tropical x temperate parents have high embryonic heat tolerance.**

609 Proportion of eggs successfully hatched following heat shock (45 min at indicated temperature)

610 among two parental genotypes that had the highest and lowest  $LT_{50}$  of all strains in this study,

611 CH (Chiapas, Mexico) and VT-12 (Vermont, USA), respectively, along with F1 progeny from

612 reciprocal crosses of these two parental lines, CH ♀ x VT ♂ and VT ♀ x CH ♂ (♀ = dam; ♂ = sire).

613 Note that VT-12 is labeled “VT” in the legend.  $LT_{50}$ : CH = 36.24°C, VT-12 = 34.23°C, CH ♀ x

614 VT ♂ = 35.83°C, VT ♀ x CH ♂ = 35.80°C (Logistic model, Extra sum-of-squares F-test on lower

615  $LT_{50}$  of VT-12,  $F_{3,166} = 6.695$ , \*\*\* $P = 0.0003$ ).

616

617

618 **Supplemental Table S1.**  
 619 **Stock information, collection locales, and thermal tolerance data for isofemale lines used in**  
 620 **this study.**

| Stock No.      | Locale          | State/Country       | Lat. (°N) | Long. (°E) | Adult CT <sub>max</sub> (°C) | Embryo LT <sub>50</sub> (°C) |
|----------------|-----------------|---------------------|-----------|------------|------------------------------|------------------------------|
| VTECK_2        | East Calais     | Vermont, USA        | 44.3664   | -72.4300   | 39.69                        | 35.18                        |
| VTECK_4        | East Calais     | Vermont, USA        | 44.3664   | -72.4300   | -                            | 35.03                        |
| VTECK_5        | East Calais     | Vermont, USA        | 44.3664   | -72.4300   | 38.27                        | 34.75                        |
| VTECK_8        | East Calais     | Vermont, USA        | 44.3664   | -72.4300   | -                            | 34.81                        |
| VTECK_9        | East Calais     | Vermont, USA        | 44.3664   | -72.4300   | -                            | 35.27                        |
| VTECK_10       | East Calais     | Vermont, USA        | 44.3664   | -72.4300   | 40.52                        | 34.17                        |
| VTECK_12       | East Calais     | Vermont, USA        | 44.3664   | -72.4300   | -                            | 34.23                        |
| VTECK_14       | East Calais     | Vermont, USA        | 44.3664   | -72.4300   | -                            | 35.01                        |
| BEA_5          | Beasley Orchard | Indiana, USA        | 39.7637   | -86.4766   | -                            | 35.13                        |
| BEA_16         | Beasley Orchard | Indiana, USA        | 39.7637   | -86.4766   | 37.62                        | 35.11                        |
| BEA_21         | Beasley Orchard | Indiana, USA        | 39.7637   | -86.4766   | 38.33                        | 34.94                        |
| BEA_32         | Beasley Orchard | Indiana, USA        | 39.7637   | -86.4766   | -                            | 35.30                        |
| BEA_36         | Beasley Orchard | Indiana, USA        | 39.7637   | -86.4766   | 38.07                        | 35.29                        |
| RFM_4          | Raleigh         | North Carolina, USA | 35.7636   | -78.6627   | -                            | 34.98                        |
| RFM_6          | Raleigh         | North Carolina, USA | 35.7636   | -78.6627   | -                            | 34.95                        |
| RFM_16         | Raleigh         | North Carolina, USA | 35.7636   | -78.6627   | -                            | 34.03                        |
| RFM_19         | Raleigh         | North Carolina, USA | 35.7636   | -78.6627   | 39.60                        | 34.63                        |
| RFM_34         | Raleigh         | North Carolina, USA | 35.7636   | -78.6627   | 37.61                        | 34.96                        |
| RFM_48         | Raleigh         | North Carolina, USA | 35.7636   | -78.6627   | 37.61                        | 34.94                        |
| 14021-0231.22  | Chiapa de Corzo | Chiapas, Mexico     | 16.7022   | -93.0081   | 39.13                        | 36.24                        |
| 14021-0231.34  | Monkey Hill     | St. Kitts           | 17.3240   | -62.7250   | 39.05                        | 35.44                        |
| 14021-0231.182 | Accra           | Ghana               | 5.5557    | -0.1963    | 38.74                        | 35.65                        |
| 14021-0231.45  | Mumbai          | Maharashtra, India  | 19.0760   | 72.8777    | 39.50                        | 36.14                        |
| 14021-0231.198 | Guam            | Guam, USA           | 13.4443   | 144.7937   | 39.01                        | 35.51                        |

622

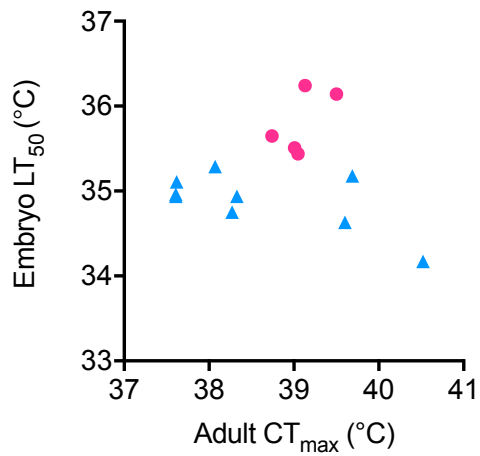

623

624

625 **Supplemental Figure S1.**

626 **No significant relationship between adult CT<sub>max</sub> and embryo LT<sub>50</sub>.**

627 Adult thermal tolerance and embryonic thermal tolerance were not correlated among all  
628 isofemale lines (Least-squares linear regression,  $R^2 = 0.0005$ ). Tropical isofemale lines are  
629 shown in pink circles and temperate isofemale lines are shown in blue triangles.

630

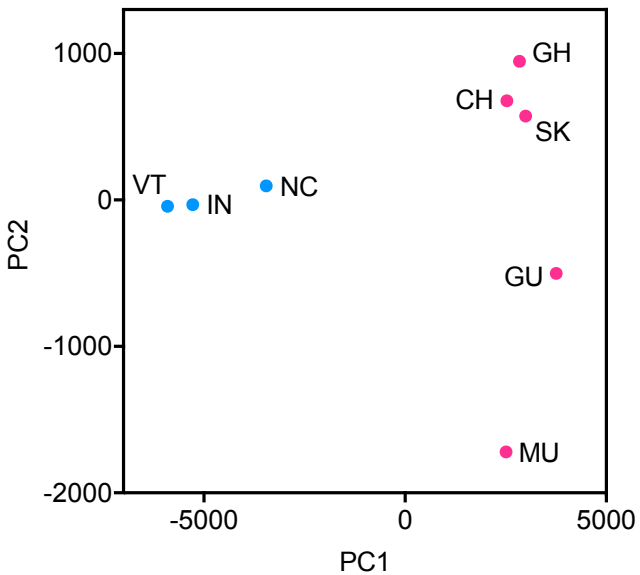

631

632 **Supplemental Figure S2.**

633 **Principal components analysis of 19 Bioclim variables at each of the 8 collection sites.**

634 Plotted are scores of the first two principle components (PC1 vs. PC2), which describe the major  
635 axes of variation in 19 bioclimatic variables among the collection sites. PC1 and PC2 explained  
636 95.6% and 4%, respectively, of the variation in climate among sites. Temperature seasonality  
637 was the top component loading on PC1, explaining 98% of the variation in PC1, and annual  
638 precipitation was the top component loading on PC2, explaining 49% of the variation in PC2.

639 Temperate sites are shown in blue and tropical sites in pink.

640

641

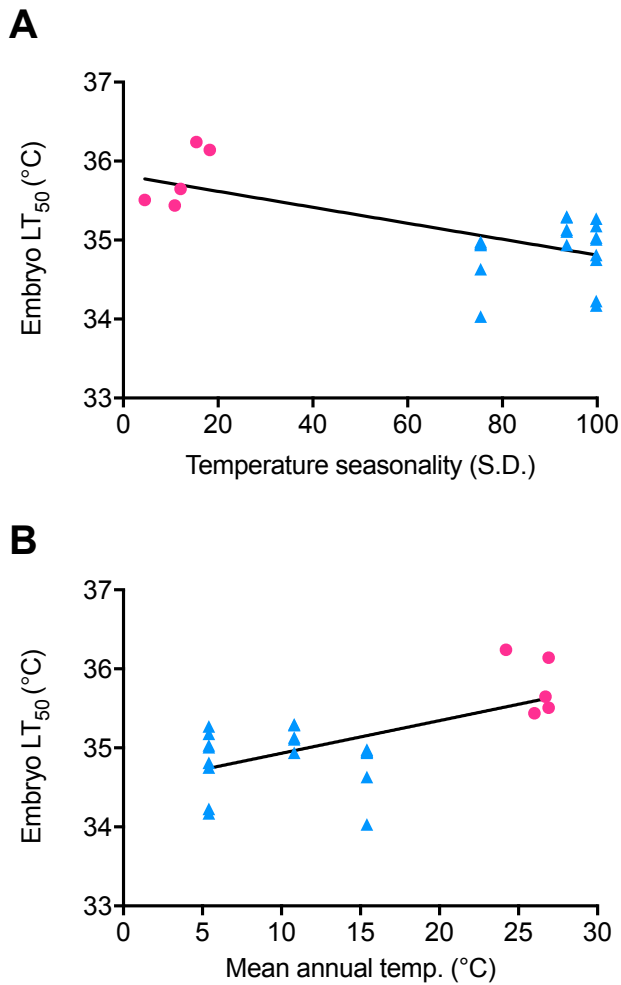

642

643 **Supplemental Figure S3.**

644 **Relationship between embryonic thermal tolerance and (A) temperature seasonality and**  
645 **(B) mean annual temperature.**

646 (A) Temperature seasonality is the standard deviation in temperature (°C) over the course of the  
647 year, averaged across the years 1960 to 1990 for each of the sites. Solid black line represents the  
648 regression line fit, which had a significantly negative slope (Least-squares linear regression,  $R^2 =$   
649  $0.42$ ,  $P = 0.0006$ ,  $y = -0.01x + 35.82$ ). (B) Mean annual temperature is the average yearly  
650 temperature from 1960 to 1990 for each of the sites. Solid black line represents the regression  
651 line fit, which had a significantly positive slope (Least-squares linear regression,  $R^2 = 0.37$ ,  $P =$   
652  $0.0016$ ,  $y = 0.041x + 34.52$ ). In both A and B, tropical isofemale lines are shown in pink circles  
653 and temperate isofemale lines are shown in blue triangles.

654



655

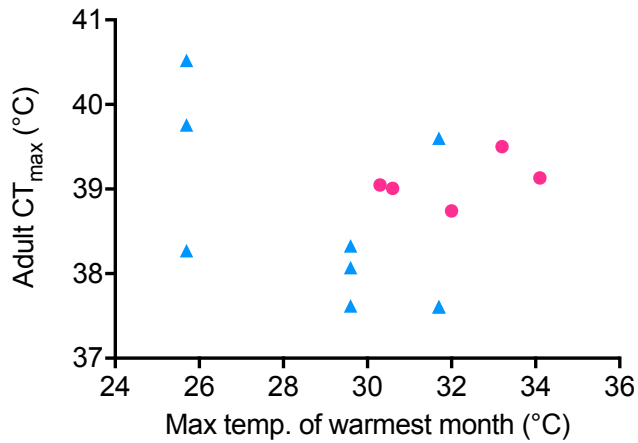

656

657 **Supplemental Figure S4.**

658 **No significant relationship between adult thermal tolerance ( $CT_{max}$ ) and maximum habitat**  
659 **temperature ( $T_{max}$ ).**

660 Variation in adult thermal tolerance showed no correspondence to variation in  $T_{max}$  among all  
661 collection sites (Least-squares linear regression,  $R^2 = 0.055$ ). Tropical isofemale lines are shown  
662 in pink circles and temperate isofemale lines are shown in blue triangles.
